# Supplementary material for: Synthetic hematocrit derived from the longitudinal relaxation of blood can lead to clinically significant errors in measurement of extracellular volume fraction in pediatric and young adult patients
Source: PubMed Central journal article supplement (PMC5541652; doi:10.1186/s12968-017-0377-z), 2017-08-02
Supplement: 12968_2017_377_MOESM3_ESM.pdf [file 12968_2017_377_MOESM3_ESM.pdf]

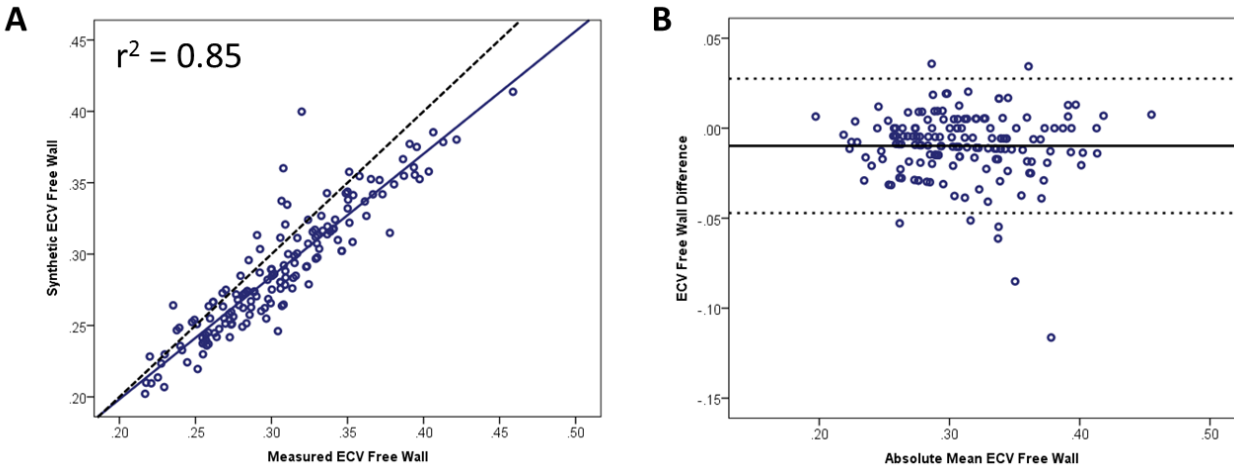

**Figure S3: Linear regression fit of measured vs synthetic ECV at mid-free wall for static hematocrit = 45% model (partition coefficient).** Similar regression fit to that of other synthetic ECV models at the mid-free wall (A) with slightly larger 1.6% bias on Bland-Altman analysis (B). Dashed line in A represents line of identity. For Bland-Altman plots, solid line represents mean difference and dashed lines (B) are  $\pm 1.96SD$ .
