# Supplementary material for: Synthetic hematocrit derived from the longitudinal relaxation of blood can lead to clinically significant errors in measurement of extracellular volume fraction in pediatric and young adult patients
Source: PubMed Central journal article supplement (PMC5541652; doi:10.1186/s12968-017-0377-z), 2017-08-02
Supplement: 12968_2017_377_MOESM6_ESM.pdf [file 12968_2017_377_MOESM6_ESM.pdf]

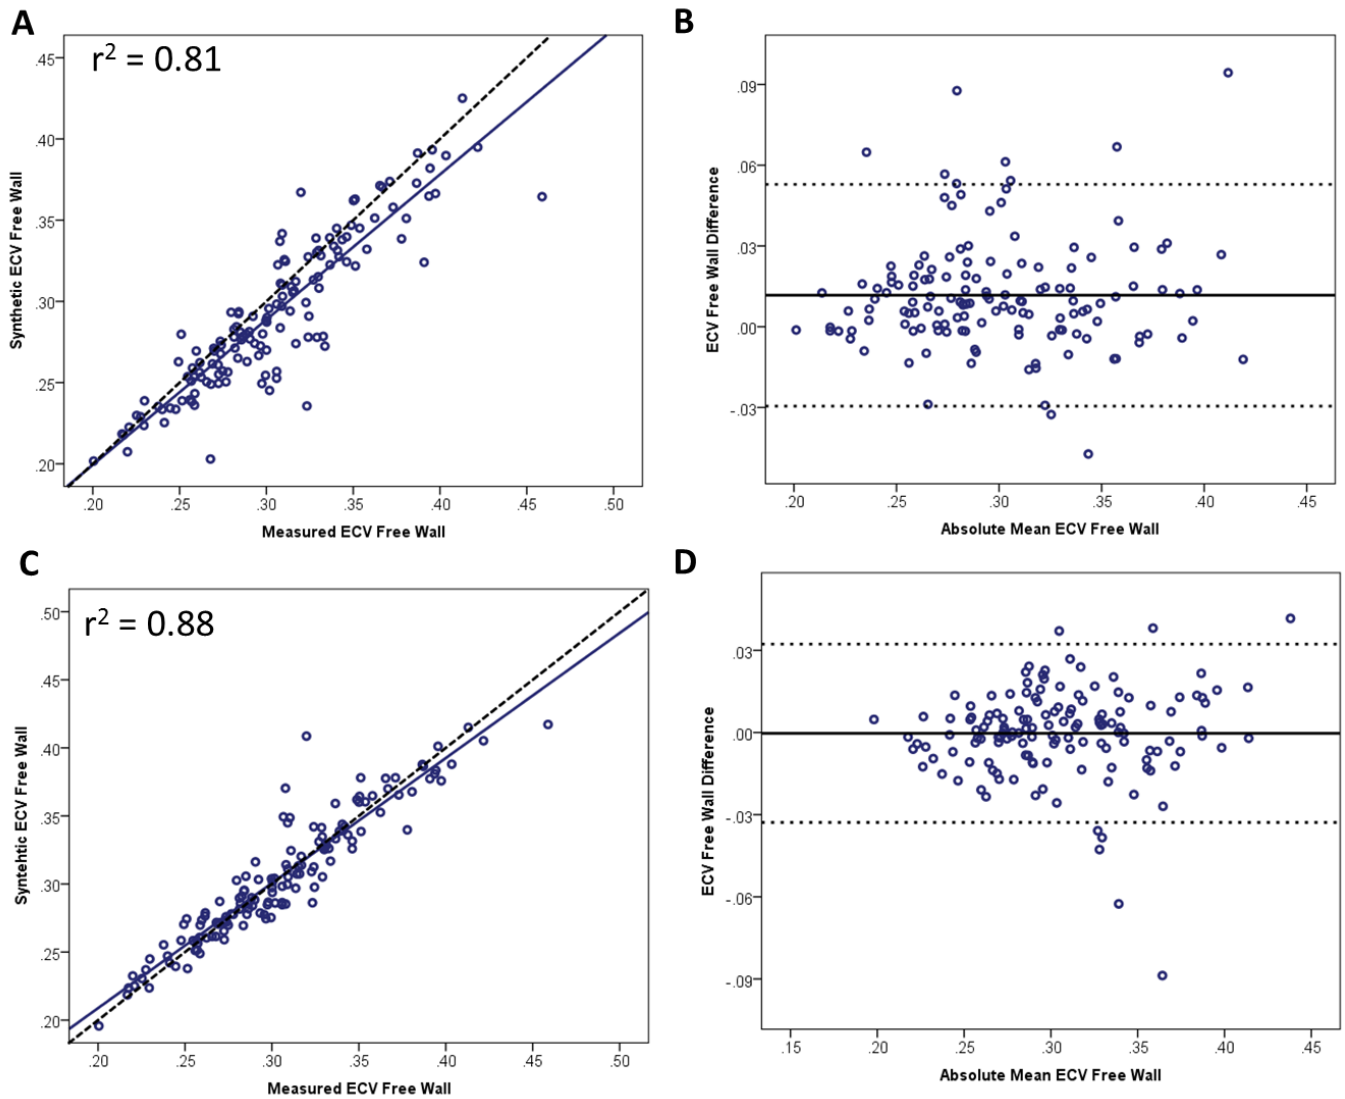

**Figure S6: Linear regression fit of measured vs synthetic  $ECV_{Free\ Wall}$  for published and local models excluding CMRs without same day Hct.** Slightly improved but still excellent regression fits for  $ECV_{Free\ Wall}$  using the published model (A) and local model (C) when CMRs without same day Hct values available. Positive bias seen on Bland-Altman analysis of published model similar to that observed for the full cohort (B). Elimination of bias similar to that observed with full cohort seen on Bland-Altman analysis of local model. Dashed line in A and C represents line of identity. For Bland-Altman plots, solid line represents mean difference and dashed lines (B and D) are  $\pm 1.96SD$ .
